# Supplementary material for: Recent Advances in Nanomaterial-Based Biosensors for Pesticide Detection in Foods
Source: MDPI journal article supplement (doi:10.3390/bios12080572), 2022-07-27
Supplement: s1 [file s1]

## SUPPLEMENTARY MATERIAL

### Recent advances in nanomaterial-based biosensors for pesticide detection in foods

Ana Carolina de Moraes Mirres <sup>1,2,3,4,5,†</sup>, Brenno Enrique Pereira de Matos da Silva <sup>1,2,3,4,5,†</sup>, Leticia Tessaro <sup>2,3,4,5,6</sup>, Diego Galvan <sup>2,3,4,5,6</sup>, Jelmir Craveiro de Andrade <sup>2,3,4,5,6</sup>, Adriano Aquino <sup>2,3,4,5,6</sup>, Nirav Joshi <sup>2,3,4,5</sup>, and Carlos Adam Conte-Junior <sup>2,3,4,5,6,\*</sup>

---

**Corresponding author.** Departamento de Bioquímica, Instituto de Química, Universidade Federal do Rio de Janeiro (UFRJ), Rio de Janeiro, RJ, 21941-901, Brasil. [conte@iq.ufrj.br](mailto:conte@iq.ufrj.br) (Conte-Junior C.A.).

**Table S1** presents all LMR values established by the Codex Alimentarius [1] and European Commission [2] the respective pesticides applied.

| LOD                                                                                                            | Pesticide       | Food matrix            | LMR (mg kg <sup>-1</sup> ) |              | Ref   |
|----------------------------------------------------------------------------------------------------------------|-----------------|------------------------|----------------------------|--------------|-------|
|                                                                                                                |                 |                        | CODEX                      | E.U.         |       |
| 2,17 x10 <sup>-2</sup> ngL <sup>-1</sup>                                                                       | MP              | Chinese cabbage        | 0.05                       | 0.01         | [3]   |
| 19 - 77 ngL <sup>-1</sup>                                                                                      | 11 pesticides   | OPPs                   | Apple<br>cabbage           | -<br>-       | [4]   |
| 81 ng L <sup>-1</sup>                                                                                          | methomyl        | Apple<br>cabbage       | 0.3<br>NAC                 | 0.01<br>0.01 |       |
| 1.0 nM                                                                                                         | Carbamate       | Fruit                  | -                          | -            | [5]   |
| CPF : 36 ng L <sup>-1</sup>                                                                                    | Chlorpyrifos    | Apple                  | NAC                        | 0.01         | [6]   |
|                                                                                                                |                 | Pak choi               | NAC                        | NAC          |       |
| 70 x10 <sup>-3</sup> ng L <sup>-1</sup>                                                                        | Chlorpyrifos    | Chinese cabbage        | 1.0                        | 0.01         | [7]   |
|                                                                                                                |                 | Lettuce                | NAC                        | 0.01         |       |
| 2.48x10 <sup>3</sup> ng L <sup>-1</sup>                                                                        | Isocarbophos    | Cabbage                | NAC                        | NAC          | [8]   |
|                                                                                                                |                 | Peach                  | NAC                        | NAC          |       |
|                                                                                                                |                 | Tea                    | NAC                        | NAC          |       |
| 7.12 x 10 <sup>-5</sup> nM                                                                                     | Acetamiprid     | Tea                    | NAC                        | 0.05         | [9]   |
| 1x 10 <sup>-6</sup> nM                                                                                         | Malathion       | Lettuce                | NAC                        | 0.5          | [10]  |
| 17.18 ng L <sup>-1</sup>                                                                                       | Malathion       | Cucumber               | 0.2                        | 0.02         | [11]  |
|                                                                                                                |                 | long bean              | 1.0                        | 0.02         |       |
| 17 ng L <sup>-1</sup> .                                                                                        | MP              | Apple                  | 0.2                        | 0.01         | [12]  |
|                                                                                                                |                 | Carrot                 | NAC                        | 0.01         |       |
| 34 ng L <sup>-1</sup>                                                                                          | OPs             | Apple                  | -                          | -            | [13]  |
| 4x10 <sup>3</sup> ng L <sup>-1</sup>                                                                           | Paraoxon        | Chinese chives         | NAC                        | 0.02         | [14]  |
|                                                                                                                |                 | Cabbage                | NAC                        | 0.01         |       |
| 5 x 10 <sup>-4</sup> nM                                                                                        | Malathion       | Apple                  | 0.5                        | 0.02         | [15]  |
| 212 nM                                                                                                         | Paraoxon        | Milk                   | NAC                        | 0.01         | [16]  |
| 8.2 nmol L <sup>-1</sup>                                                                                       | MP              | Apple                  | 0.2                        | 0.01         | [17]  |
|                                                                                                                |                 | Cabbage,               | 0.05                       | 0.01         |       |
|                                                                                                                |                 | Spinach                | NAC                        | 0.01         |       |
|                                                                                                                |                 | Lettuce                | NAC                        | 0.01         |       |
| Fenthion:1.3 nM                                                                                                | Fenthion        | Cabbage juice          | NAC                        | 0.01         | [18]  |
| Dichlovos: 5.3 nM                                                                                              | Dichlorvos      |                        |                            |              |       |
| 0.36 nM                                                                                                        | Acetamiprid     | Celery leaves          | NAC                        | NAC          | [19]  |
| Methyl parathion:3,04x10 <sup>-3</sup> ng L <sup>-1</sup>                                                      |                 | Chinese green tea      |                            |              |       |
| Malathion:1,96x10 <sup>-3</sup> ng L <sup>-1</sup><br>chloropyrifos: 2,060x10 <sup>-3</sup> ng L <sup>-1</sup> | OPs             | Cabbage water          | -                          | -            | [20]  |
| NC : 2.40 x 10 <sup>-3</sup> nM                                                                                | ethyl parathion | Orange and Apple juice | NAC                        | NAC          | [21]  |
| MHCS: 14.8 ng L <sup>-1</sup><br>Fe3O4@MHCS: 18.2 ng L <sup>-1</sup>                                           | Malathion       | Pear                   | 1.0                        | 0.02         | [22]  |
| 8.6x10 <sup>-6</sup> - 7.1 x10 <sup>-5</sup> nM                                                                | Chitosan        | Potato                 | NAC                        | NAC          | [23]  |
|                                                                                                                |                 | Corn grans             | NAC                        | NAC          |       |
|                                                                                                                | malathion       | Potato                 | NAC                        | 0.02         |       |
|                                                                                                                |                 | Corn grans             | 0.02                       | 8.0          |       |
|                                                                                                                | MP              | Potato                 | 0.05                       | 0.01         |       |
|                                                                                                                |                 | Corn grans             | NAC                        | 0.02         |       |
| chlorpyrifos                                                                                                   | Potato          | 2.0                    | 0.01                       |              |       |
|                                                                                                                | Corn grans      | 0.01                   | 0.01                       |              |       |
| Chlorpyrifos 730 ng L <sup>-1</sup>                                                                            | Chlorpyrifos    | Maize                  | 0.05                       | 0.01         | [100] |

|                                                                                           |                              |                               |      |      |      |
|-------------------------------------------------------------------------------------------|------------------------------|-------------------------------|------|------|------|
| diazinon $6.7 \times 10^{-3} \text{ ng L}^{-1}$<br>malathion $740 \text{ ng L}^{-1}$<br>, |                              | long bean                     | 0.01 | 0.01 |      |
|                                                                                           |                              | cauliflower                   | 0.05 | 0.01 |      |
|                                                                                           |                              | eggplant                      | NAC  | 0.01 |      |
|                                                                                           |                              | oyster mushroom               | NAC  | NAC  |      |
|                                                                                           |                              | shiitake mushroom             | NAC  | NAC  |      |
|                                                                                           |                              | apple                         | NAC  | 0.01 |      |
|                                                                                           |                              | orange                        | NAC  | 0.01 |      |
|                                                                                           |                              | tomato                        | NAC  | 0.01 |      |
|                                                                                           |                              | blueberry                     | NAC  | 0.01 |      |
|                                                                                           |                              | spinach                       | NAC  | 0.01 |      |
|                                                                                           |                              | lettuce                       | NAC  | 0.01 |      |
|                                                                                           |                              | cabbage                       | 1.0  | 0.01 |      |
| Malathion                                                                                 |                              | Maize                         | 0.05 | 8.0  |      |
|                                                                                           |                              | long bean                     | 1.0  | NAC  |      |
|                                                                                           |                              | cauliflower                   | NAC  | 0.02 |      |
|                                                                                           |                              | eggplant                      | NAC  | 0.02 |      |
|                                                                                           |                              | oyster mushroom               | NAC  | NAC  |      |
|                                                                                           |                              | shiitake mushroom             | NAC  | NAC  |      |
|                                                                                           |                              | apple                         | 0.5  | 0.02 |      |
|                                                                                           |                              | orange                        | NAC  | 2.0  |      |
|                                                                                           |                              | tomato                        | 0.5  | 0.02 |      |
|                                                                                           |                              | blueberry                     | NAC  | NAC  |      |
|                                                                                           |                              | spinach                       | 3.0  | 0.02 |      |
|                                                                                           |                              | lettuce                       | NAC  | 0.5  |      |
|                                                                                           |                              | cabbage                       | NAC  | 0.02 |      |
| Diazinon                                                                                  |                              | Maize                         | 0.02 | 0.01 |      |
|                                                                                           |                              | long bean                     | 0.2  | 0.01 |      |
|                                                                                           |                              | cauliflower                   | NAC  | 0.01 |      |
|                                                                                           |                              | eggplant                      | NAC  | 0.01 |      |
|                                                                                           |                              | oyster mushroom               | NAC  | NAC  |      |
|                                                                                           |                              | shiitake mushroom             | NAC  | NAC  |      |
|                                                                                           |                              | apple                         | NAC  | 0.01 |      |
|                                                                                           |                              | orange                        | NAC  | 0.01 |      |
|                                                                                           |                              | tomato                        | 0.5  | 0.01 |      |
|                                                                                           |                              | blueberry                     | NAC  | NAC  |      |
|                                                                                           |                              | spinach                       | 0.5  | 0.01 |      |
|                                                                                           |                              | lettuce                       | 0.5  | 0.01 |      |
|                                                                                           |                              | cabbage                       | 0.5  | 0.01 |      |
| $2 \text{ ng L}^{-1}$                                                                     | Parathion                    | pear                          | 0.2  | 0.05 | [24] |
|                                                                                           |                              | cabbage                       | NAC  | 0.05 |      |
|                                                                                           |                              | rice                          | NAC  | 0.05 |      |
| $2.13 \text{ ng kg}^{-1}$                                                                 | Parathion                    | rice                          | NAC  | 0.05 | [24] |
|                                                                                           |                              | pear                          | 0.2  | 0.05 |      |
|                                                                                           |                              | apple                         | 0.2  | 0.05 |      |
|                                                                                           |                              | cabbage                       | NAC  | 0.05 |      |
| 50 nM                                                                                     | DMMP                         | apple juice                   | US   | US   | [25] |
| $5 \times 10^{-1} \text{ ng L}^{-1}$                                                      | Malathion                    | cauliflower                   | NAC  | 0.02 | [26] |
|                                                                                           |                              | cabbage                       | NAC  | 0.02 |      |
| $1.4 \times 10^{-3} \text{ ng L}^{-1}$                                                    | Paraoxon                     | Vegetable<br>( not specified) | US   | US   | [27] |
| 50 ng L <sup>-1</sup> .                                                                   | Chlorpyrifos                 | cabbage                       | 1.0  | 0.01 | [28] |
|                                                                                           |                              | rape                          | NAC  | NAC  |      |
|                                                                                           |                              | lettuce                       | NAC  | 0.01 |      |
| 0.3 nmol L <sup>-1</sup>                                                                  | Diazinon                     | lettuce juice                 | 0.5  | 0.01 | [29] |
|                                                                                           |                              | tomato juice                  | 0.5  | 0.01 |      |
| $1 \times 10^{-6} \text{ nM}$                                                             | Malathion                    | lettuce                       | NAC  | 0.5  | [30] |
| 0.1 nM                                                                                    | Paraoxon                     | potato                        | US   | US   | [31] |
| 0.004 nM                                                                                  | Organophosphate<br>pesticide | spinach and<br>cabbage        | -    | -    | [32] |

|                                                                                                                                                           |                                             |                                 |            |              |      |
|-----------------------------------------------------------------------------------------------------------------------------------------------------------|---------------------------------------------|---------------------------------|------------|--------------|------|
| 1 ng L <sup>-1</sup>                                                                                                                                      | Chlorpyrifos-methyl                         | lettuce                         | NAC        | 0.01         | [33] |
| 0.7nM                                                                                                                                                     | Acetamiprid                                 | cabbage leaves                  | 0.7        | 0.4          | [34] |
| 3x10 <sup>-6</sup> nmol L <sup>-1</sup>                                                                                                                   | Paraoxon                                    | spinach juice                   | US         | US           | [35] |
| Malathion : 3.11 x 10 <sup>-4</sup> ng L <sup>-1</sup>                                                                                                    | Malathion                                   | chinese cabbage                 | NAC        | 0.02         | [58] |
| methyl parathion : 1.88 x 10 <sup>-4</sup> ng L <sup>-1</sup>                                                                                             | Methyl parathion                            | chinese cabbage                 | 0.05       | 0.01         |      |
| 20 ng L <sup>-1</sup>                                                                                                                                     | Chlorpyrifos                                | cabbage<br>spinach              | NAC<br>NAC | 0.01<br>0.01 | [37] |
| 0.23 nM                                                                                                                                                   | Dichlorvos                                  | cabbage juice                   | NAC        | 0.01         | [38] |
| methyl paraoxon: 240 nM<br>methyl parathion: 260 nM<br>ethyl paraoxon: 220 nM                                                                             | OPs                                         | Lactuca sativa L                | -          | -            | [61] |
| 1.3 x10 <sup>3</sup> ng L <sup>-1</sup>                                                                                                                   | Profenofos                                  | Chinese chives                  | NAC        | 0.05         | [62] |
| Monocrotophos 2510 ng L <sup>-1</sup><br>Dimethoate 1500 ng L <sup>-1</sup>                                                                               | Monocrotophos<br>Dimethoate                 | Soft drinks                     | -          | -            | [40] |
| 3.6 nM                                                                                                                                                    | Phosmet                                     | Wheat flour                     | NAC        | NAC          | [41] |
| 0.2 nM                                                                                                                                                    | Pirimiphosmethyl                            | Olive oil                       | US         | US           | [42] |
| Paraoxon 1.62 x10 <sup>-6</sup> nM<br>Dichlorvos 7.53 x10 <sup>-5</sup> nM<br>Malathion 0.23 nM<br>Triazophos 1.06 x10 <sup>-2</sup> nM                   | Paraoxon                                    | apple juice                     | US         | US           | [43] |
|                                                                                                                                                           |                                             | tomato juice                    | US         | US           |      |
|                                                                                                                                                           | Dichlorvos                                  | apple juice                     | NAC        | 0.01         |      |
|                                                                                                                                                           |                                             | tomato juice                    | NAC        | 0.01         |      |
|                                                                                                                                                           | Malathion                                   | apple juice                     | 0.5        | 0.02         |      |
|                                                                                                                                                           |                                             | tomato juice                    | 0.01       | 0.02         |      |
|                                                                                                                                                           | Triazophos                                  | apple juice                     | NAC        | 0.01         |      |
|                                                                                                                                                           |                                             | tomato juice                    | NAC        | 0.01         |      |
| 1ng L <sup>-1</sup>                                                                                                                                       | Malathion                                   | Lettuce leaves                  | NAC        | 0.5          | [44] |
| 1.9 nmol L <sup>-1</sup>                                                                                                                                  | Carbamate pesticide                         | Tomatoes                        | -          | -            | [45] |
| 1.70x10 <sup>3</sup> ng/L                                                                                                                                 | Paraoxon                                    | apple and eggplant              | -          | -            | [12] |
| 3.9x10 <sup>2</sup> ng L <sup>-1</sup>                                                                                                                    | Malathion                                   | cabbage                         | NAC        | 0.02         | [46] |
|                                                                                                                                                           |                                             | carrots                         | NAC        | 0.02         |      |
|                                                                                                                                                           | Organophosphate insecticide                 | cabbage                         | -          | -            |      |
|                                                                                                                                                           |                                             | carrots                         | -          | -            |      |
| 1.7 x10 <sup>-3</sup> nM                                                                                                                                  | Organophosphate pesticide                   | Cabbage and Cucumber            | -          | -            | [47] |
| Pirimicarb: 5 x10 <sup>4</sup> ng L <sup>-1</sup><br>dichlorvos: 1 x10 <sup>4</sup> ng L <sup>-1</sup><br>carbaryl: 1 x10 <sup>4</sup> ng L <sup>-1</sup> | Organophosphorus and carbamate insecticides | Lettuce, choy, and rice samples | -          | -            | [48] |
| biosensors: 26 nM                                                                                                                                         | Nitrofen                                    | Apricot                         | US         | 0.01         | [49] |
| acetochlor : 6.3 x10 <sup>2</sup> ng L <sup>-1</sup><br>fenpropathrin:2.4 x10 <sup>2</sup> ng L <sup>-1</sup>                                             | Acetochlor                                  | Corn                            | 0.04       | 0.01         | [50] |
|                                                                                                                                                           |                                             | sorghum                         | NAC        | 0.01         |      |
|                                                                                                                                                           |                                             | soybean                         | UC         | UC           |      |
|                                                                                                                                                           |                                             | apple                           | NAC        | 0.01         |      |
|                                                                                                                                                           |                                             | orange                          | NAC        | 0.01         |      |
|                                                                                                                                                           |                                             | peach                           | NAC        | 0.01         |      |
|                                                                                                                                                           |                                             | cabbage                         | NAC        | 0.01         |      |
|                                                                                                                                                           |                                             | broccoli                        | NAC        | 0.01         |      |
|                                                                                                                                                           |                                             | tomato                          | NAC        | 0.01         |      |
|                                                                                                                                                           |                                             | drinking water                  | NAC        |              |      |
|                                                                                                                                                           | Fenpropathrin                               | Corn                            | NAC        | 0.01         |      |
|                                                                                                                                                           |                                             | sorghum                         | NAC        | 0.01         |      |
|                                                                                                                                                           |                                             | soybean                         | UC         | UC           |      |
|                                                                                                                                                           |                                             | apple                           | NAC        | 0.01         |      |
|                                                                                                                                                           |                                             | orange                          | NAC        | 2.0          |      |
|                                                                                                                                                           |                                             | peach                           | NAC        | 0.01         |      |
|                                                                                                                                                           |                                             | cabbage                         | NAC        | 0.01         |      |
|                                                                                                                                                           |                                             | broccoli                        | NAC        | 0.01         |      |
|                                                                                                                                                           |                                             | tomato                          | 1.0        | 0.01         |      |
|                                                                                                                                                           |                                             | drinking water                  | UC         | UC           |      |
| 1.67 x 10 <sup>-3</sup> nM                                                                                                                                | OPs                                         | Pakchoi, cabbage and lettuce    | -          | -            | [51] |

|                       |              |                |      |      |      |
|-----------------------|--------------|----------------|------|------|------|
| 50 ng·L <sup>-1</sup> | Carbendazim  | Apple          | NAC  | 0.2  | [52] |
|                       |              | cucumber       | 0.05 | 0.1  |      |
|                       |              | matcha powder  | UC   | UC   |      |
| 29 nM                 | Dichlorvos   | cabbage juice  | NAC  | 0.01 | [53] |
| 70 ng L <sup>-1</sup> | Chlorpyrifos | Spiked apple   | NAC  | 0.01 | [54] |
|                       |              | celery cabbage | 1.0  | 0.01 |      |
